# Supplementary material
Source: PubMed Central journal article supplement (PMC10805149)
Supplement: NIHMS1958651-supplement-Supplementary_material.pdf [file NIHMS1958651-supplement-Supplementary_material.pdf]

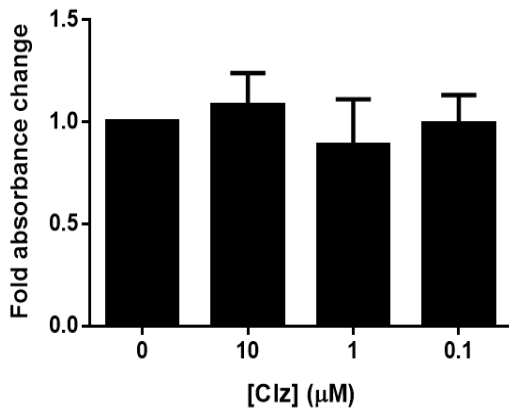

Supplementary figure S1. Evaluation of clozapine as a lipogenic stimulus in already differentiated 3T3-L1 cells. Cells were prepared and induced with a threshold-level adipogenic stimulus (2x StemXVivo supplement), and cultured for a total of 8 days. At 8 days post-induction (PI), cultures were exposed to clozapine at the indicated concentrations for a total of 6 days, until culture termination at 14 days PI. Cells were then subjected to ORO staining, as described in the methods section. Quantitative data for ORO staining is shown, where internal negative control absorbance values for each biological replicate were set as background; final data (mean  $\pm$  SEM) are expressed as fold change versus internal positive control (0  $\mu$ M Clz) for each biological replicate (n = 3).

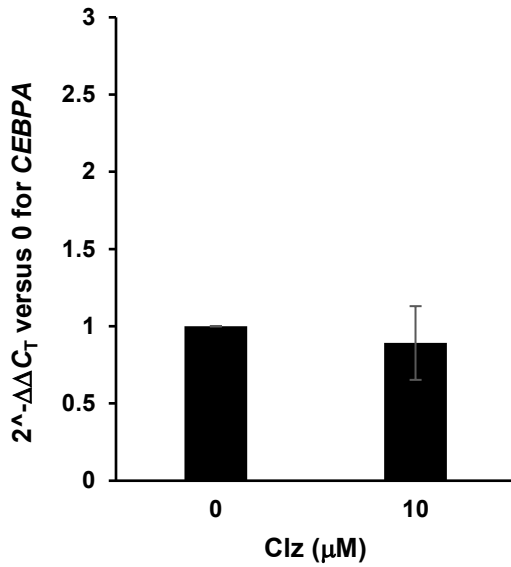

Supplementary figure S2. Assessment of *CEBPA* expression by RT-qPCR. Prepared UD 3T3-L1 cells were exposed to a threshold-level adipogenic stimulus for 72 hours alone (0  $\mu\text{M}$  Clz, or, positive control condition) or in combination with 10  $\mu\text{M}$  Clz. Total RNA was then isolated, subjected to reverse transcription, and analyzed by RT-qPCR using a TaqMan set for *CEBPA*, with 18S rRNA as the endogenous control. Resulting data were analyzed according to the  $2^{-\Delta\Delta C_T}$  method, determining the fold change in *CEBPA* expression versus the positive control (0  $\mu\text{M}$  Clz) condition. Data are mean  $\pm$  SEM (n = 5).

A)

Negative control  
(unstained)

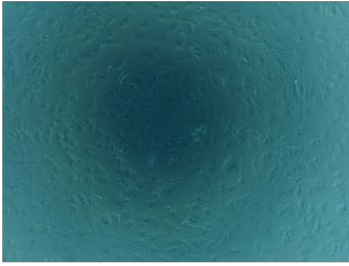

Negative control  
(after ORO staining)

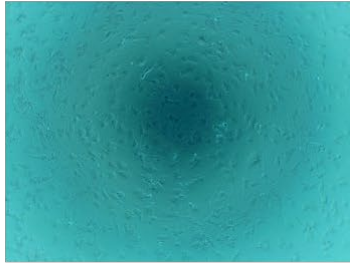

B)

Positive control (0  $\mu$ M Cpz)

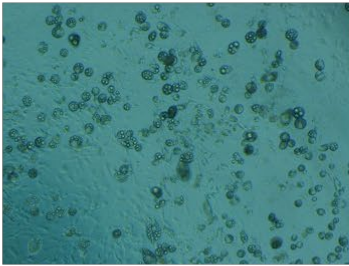

10  $\mu$ M Cpz

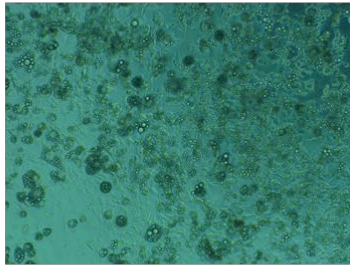

5  $\mu$ M Cpz

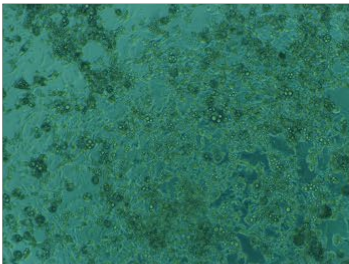

1  $\mu$ M Cpz

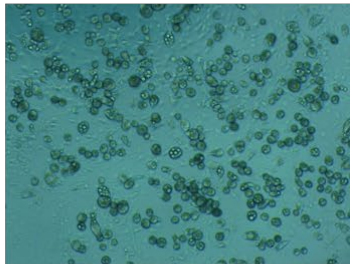

C)

Negative control

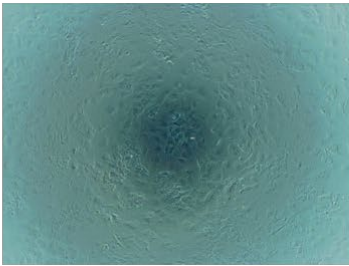

Positive control (0  $\mu$ M Cpz)

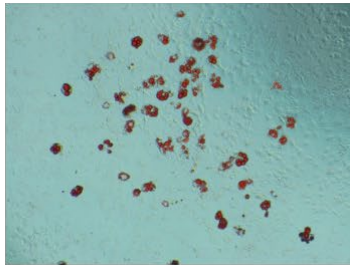

10  $\mu$ M Cpz

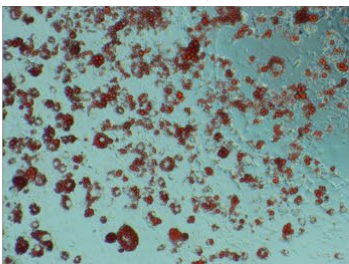

Supplementary figure S3. Additional representative micrographs for Cpz-treated cultures. A. Representative (of n = 6 biological replicates) photomicrographs, obtained at 100x, for the negative control condition (both before and after ORO staining) corresponding to the biological replicate shown in Figure 4 (at D14 PI). B. Representative (of n = 6 biological replicates) photomicrographs, obtained at 100x, of unstained cells which correspond to the ORO-stained cell images and quantitative data shown in Figure 4 (at D14 PI). C. Representative (of n = 5 biological replicates) photomicrographs, obtained at 100x, of ORO-stained cells at D17 PI, corresponding to the quantitative data shown in Figure 4.
